# Supplementary material for: A cis-regulatory module activating transcription in the suspensor contains five cis-regulatory elements
Source: PubMed Central journal article supplement (PMC4441743; doi:10.1007/s11103-015-0308-z), 2015-03-22
Supplement: 11103_2015_308_MOESM1_ESM.pdf [file 11103_2015_308_MOESM1_ESM.pdf]

A *cis*-regulatory module activating transcription in the suspensor contains five *cis*-regulatory elements

Plant Molecular Biology

Kelli F. Henry, Tomokazu Kawashima and Robert B. Goldberg

Robert B. Goldberg (Corresponding author)

Department of Molecular, Cell and Developmental Biology, University of California, Los Angeles, 610 Charles E. Young Dr. East, Los Angeles, CA 90095-7239, USA

Email: bobg@ucla.edu

**Online Resource 1** Oligonucleotide sequences for generating constructs

| Construct    | Forward Oligonucleotides (5' to 3')                               | Reverse Oligonucleotides (5' to 3')                                  |
|--------------|-------------------------------------------------------------------|----------------------------------------------------------------------|
| m54(18-24)   | GCTGGAATTC AAGCCTAGAAAAACGAATCTGGCATATTGGTAATGAAAAGCGAA           | GATCAATTCACAGTTTTCGC                                                 |
| m54(18-20)   | GCTGGAATTC AAGCCTAGAAAAACGAATCTTTACTATTGGTAATGAAAAGCG             | GATCAATTCACAGTTTTCGC                                                 |
| m54(21-23)   | GCTGGAATTC AAGCCTAGAAAAACGAAGAGGGCCTATTGGTAATGAAAAGCGA            | GATCAATTCACAGTTTTCGC                                                 |
| m54(24-26)   | GCTGGAATTC AAGCCTAGAAAAACGAAGAGTTAAGCTTGGTAATGAAAAGCGAAG          | GATCAATTCACAGTTTTCGC                                                 |
| m54(27-28)   | GCTGGAATTC AAGCCTAGAAAAACGAAGAGTTACTAGGGGTAATGAAAAGCGAAGAA        | GATCAATTCACAGTTTTCGC                                                 |
| m54(27-28)ja | GCTGGAATTC AAGCCTAGAAAAACGAAGAGTTACTAAGGTAATGAAAAGCGAAGAA         | GATCAATTCACAGTTTTCGC                                                 |
| m54(30-31)   | GCTGGAATTC AAGCCTAGAAAAACGAAGAGTTACTATTGTGAATGAAAAGCGAAGAAAAAC    | GATCAATTCACAGTTTTCGC                                                 |
| m54(30-31)ja | GCTGGAATTC AAGCCTAGAAAAACGAAGAGTTACTATTGAAAATGAAAAGCGAAGAAAAAC    | GATCAATTCACAGTTTTCGC                                                 |
| m54(32-34)   | GCTGGAATTC AAGCCTAGAAAAACGAAGAGTTACTATTGGTCCGGAAAAAGCGAAGAAAAACCA | GATCAATTCACAGTTTTCGC                                                 |
| m54(35-37)   | TATCCGCTCACAATTCACA                                               | TAGAGGATCCCCGGGTACCGAGCTCGTGTGGTTTTCTTCGCTTGGATTACCAATAGTAACTCTTCGTT |
| m54(38-40)   | TATCCGCTCACAATTCACA                                               | TAGAGGATCCCCGGGTACCGAGCTCGTGTGGTTTTCTTCGAGGTTACCAATAGTAACTCTTCG      |
| m54(41-44)   | TATCCGCTCACAATTCACA                                               | TAGAGGATCCCCGGGTACCGAGCTCGTGTGGTTTTTCGGATCTTTTCATTACCAATAGTAACTCT    |
| m54(45-54)   | TATCCGCTCACAATTCACA                                               | TAGAGGATCCCCGGGTACCGAGCTCGGTGTGGGGATTCGCTTTTCATTACCAAT               |
| 47-bp        | GCTGGAATTCGAAAAACGAAGAGTTACTATTGG                                 | GATCAATTCACAGTTTTCGC                                                 |

Underlined nucleotides are incorporated restriction sites.

Nucleotides shown in blue are mutated relative to the *G564* 54-bp fragment.
